# Supplementary material for: Clinical characteristics and outcome of multiple myeloma patients with concomitant COVID-19 at Comprehensive Cancer Centers in Germany
Source: PubMed Central journal article supplement — Haematologica. 2020 Jul 30;105(12):2872–8. doi: 10.3324/haematol.2020.262758 (PMC7716370; doi:10.3324/haematol.2020.262758), 2020-07-30
Supplement: 2020_262758-Disclosures_Contributions.pdf [file 2020_262758-Disclosures_Contributions.pdf]

Haematologica  
HAEMATOL/2020/262758  
Version 3

Clinical characteristics and outcome of multiple myeloma patients with concomitant COVID-19 at Comprehensive Cancer Centers in Germany

Monika Engelhardt, Khalid Shoumariyeh, Amelie Rösner, Gabriele Ihorst, Francesca Biavasco, Katharina Meckel, Ivana von Metzler, Sebastian Theurich, Holger Hebart, Matthias Grube, Miriam Kull, Florian Bassermann, Kerstin Schäfer-Eckart, Anette Hoferer, Hermann Einsele, Leo Rasche, and Ralph Wäsch

Disclosures: For this report, there are not conflicting interests. ME

Contributions: M.E. designed the study, analyzed and interpreted data and wrote the manuscript; A.R., K.S., F.B. and R.W. analyzed and interpreted data and wrote the manuscript; G.I. performed statistical interpretation. All authors provided patient information/data and approved the final version of the manuscript.
