# Supplementary material for: Clinical characteristics and outcome of multiple myeloma patients with concomitant COVID-19 at Comprehensive Cancer Centers in Germany
Source: PubMed Central journal article supplement — Haematologica. 2020 Jul 30;105(12):2872–8. doi: 10.3324/haematol.2020.262758 (PMC7716370; doi:10.3324/haematol.2020.262758), 2020-07-30
Supplement: 1052872_suppl.pdf [file 1052872_suppl.pdf]

**Clinical characteristics and outcome of multiple myeloma patients with concomitant COVID-19 at Comprehensive Cancer Centers in Germany**

Monika Engelhardt,<sup>1,2</sup> Khalid Shoumariyeh,<sup>1,2</sup> Amelie Rösner,<sup>1</sup> Gabriele Ihorst,<sup>3</sup> Francesca Biavasco,<sup>1,2</sup> Katharina Meckel,<sup>4</sup> Ivana von Metzler,<sup>5</sup> Sebastian Theurich,<sup>6</sup> Holger Hebart,<sup>7</sup> Matthias Grube,<sup>8</sup> Miriam Kull,<sup>9</sup> Florian Bassermann,<sup>10</sup> Kerstin Schäfer-Eckart,<sup>11</sup> Anette Hoferer,<sup>12</sup> Hermann Einsele,<sup>4</sup> Leo Rasche<sup>4</sup> and Ralph Wäsch<sup>1,2</sup>

<sup>1</sup>Freiburg University Medical Center, Department of Internal Medicine I, Faculty of Medicine, University of Freiburg, Freiburg; <sup>2</sup>German Cancer Consortium (DKTK) Heidelberg, Heidelberg; <sup>3</sup>Clinical Trials Unit Freiburg, Faculty of Medicine, University of Freiburg, Freiburg; <sup>4</sup>Medizinische Klinik und Poliklinik II, Julius-Maximilian-University of Würzburg, Würzburg; <sup>5</sup>Universitätsklinik Frankfurt, Department of Hematology and Oncology, University of Frankfurt, Frankfurt; <sup>6</sup>LMU University Hospital München, Department of Internal Medicine III, Ludwig-Maximilian-University München, München; <sup>7</sup>Kliniken Ostalb, Stauferklinikum, Muttlangen; <sup>8</sup>Universitätsklinik Regensburg, Department of Hematology and Oncology, University of Regensburg, Regensburg; <sup>9</sup>Universitätsklinik Ulm, Department of Hematology and Oncology, University of Ulm, Ulm; <sup>10</sup>Florian Bassermann Klinikum rechts der Isar, Department of Hematology and Oncology, München; <sup>11</sup>Klinikum Nürnberg, Department of Hematology and Oncology, Nürnberg and <sup>12</sup>Robert-Bosch Krankenhaus, Stuttgart, Germany

Correspondence: MONIKA ENGELHARDT - monika.engelhardt@uniklinik-freiburg.de

doi:10.3324/haematol.2020.262758

**Supplementary Table 1. Patients in need of ICU support vs. without**

| <b>Parameters</b>                                  | <b>ICU support<br/>(n=3)</b> | <b>No ICU<br/>support (n=18)</b> |
|----------------------------------------------------|------------------------------|----------------------------------|
| <b><i>Patient characteristics</i></b>              |                              |                                  |
| Median age (years; range)                          | 60 (56-62)                   | 58 (46-83)                       |
| Male : female                                      | 3 : 0                        | 14 : 4                           |
| Median Karnofsky Performance Status (%; range)     | 60 (30-70)                   | 90 (60-100)                      |
| Median number of comorbidities (range)             | 2 (1-3)                      | 1 (0-2)                          |
| Smoking : non-smoking                              | 1 : 2                        | 3 : 15                           |
| Median R-MCI (range)                               | 6 (4-7)                      | 3 (0-7)                          |
| Median IMWG-frailty score (range)                  | 2 (1-3)                      | 1 (0-2)                          |
| <b><i>MM disease characteristics</i></b>           |                              |                                  |
| Cytogenetic risk: HR : SR                          | 1 : 2                        | 5 : 13                           |
| Median # of CRAB criteria                          | 3                            | 2                                |
| MM disease status @ Covid-19 infection             |                              |                                  |
| ID                                                 | 1                            | 1                                |
| CR                                                 | 1                            | 5                                |
| VGPR / PR                                          | 1                            | 3 / 9                            |
| Number of prior anti-MM lines                      | 1                            | 1                                |
| Prior transplant: yes : no                         | 1 : 2                        | 14 : 4                           |
| Anti-MM treatment @ Covid-19                       |                              |                                  |
| Daratumumab-combination                            | 1                            | 3                                |
| Elotuzumab-combination                             |                              | 1                                |
| VCd / KRd                                          |                              | 2 / 1                            |
| R-maintenance                                      |                              | 3                                |
| no MM therapy                                      | 2                            | 7                                |
| <b><i>Covid-19 disease outcome parameters</i></b>  |                              |                                  |
| Median time of Covid-19 infection since MM ID (ms) | 2                            | 22                               |
| Time from symptoms to test (days)                  | 5                            | 3                                |
| Median laboratory parameters                       |                              |                                  |
| ANC (x10 <sup>9</sup> /L)                          | 2.8                          | 3.0                              |
| ALC (x10 <sup>9</sup> /L)                          | 0.5                          | 0.9                              |
| LDH (U/l)                                          | 532                          | 200                              |
| CRP (mg/l)                                         | 245                          | 50                               |
| Ferritin (µg/l)                                    | 5000                         | 46                               |
| Creatinine clearance (ml/min)                      | 21                           | 79                               |
| Median time to recovery (days)                     |                              |                                  |
| from symptom onset                                 | 61                           | 16                               |
| from test positivity                               | 52                           | 14                               |
| Inpatient : outpatient treatment: yes : no         | 3 : 0                        | 14 : 4                           |
| Median time of inpatient treatment (days)          | 52                           | 14                               |
| Alive status (%)                                   | 100%                         | 100%                             |
| Covid-19 treatment                                 |                              |                                  |
| po antibiotics / iv antibiotics                    | 0 / 3                        | 2 : 12                           |
| plus Azithromycin                                  | 1                            | 3                                |
| Hydroxychloroquin                                  | 2                            | 5                                |
| Remdesivir                                         | 1                            | 0                                |
| Tocilizumab                                        | 1                            | 0                                |
| Anakinra                                           | 0                            | 1                                |
| Supportives only                                   | 0                            | 4                                |

**Abbreviations:**

R-MCI: revised myeloma comorbidity index, IMWG: International Myeloma Working Group-frailty index

HR: high risk: del17p, t(4;14), t(14;16); SR: all others,

CRAB: hypercalcemia, anemia, renal impairment, bone disease,

ID: initial diagnosis of MM, CR: complete response, VGPR/PR: very good partial response/partial response,

transplant: ASCT, VCd / KRd: bortezomib-cyclophosphamid-dexamethasone / carfilzomib-lenalidomide-dexamethasone, R: lenalidomide, ms: months
